# Supplementary material
Source: Research Square preprint supplement (doi:10.21203/rs.3.rs-9142776/v1)
Supplement: Supplementary file 1 [file 0a107fb8a64cf7e8808bba36.pdf]

Supplementary Materials for  
Institutional Quality and Pandemic Resilience:  
Cross-Country Evidence on Health and Economic  
Outcomes  
during COVID-19

Diego A. Diaz\*, Cristian Larroulet, Andres Marticorena  
School of Business and Economics, Universidad del Desarrollo

April 2, 2026

## Supplementary Figures

Supplementary Figure [S1](#) plots the bivariate association between the WGI composite and reported COVID-19 deaths per million. Supplementary Figure [S2](#) shows the corresponding relationship for excess mortality, Supplementary Figure [S3](#) shows the relationship for end-2021 full vaccination coverage, and Supplementary Figure [S4](#) shows the relationship for GDP growth in 2020.

Supplementary Figure [S5](#) summarizes correlations between the individual WGI dimensions and the main pandemic outcomes. Supplementary Figure [S6](#) compares the evolution of the

---

\*Corresponding author: Diego A. Diaz. Email: [diegodiaz@uchicago.edu](mailto:diegodiaz@uchicago.edu).

OxCGRT Stringency Index in Chile and selected Latin American peers.

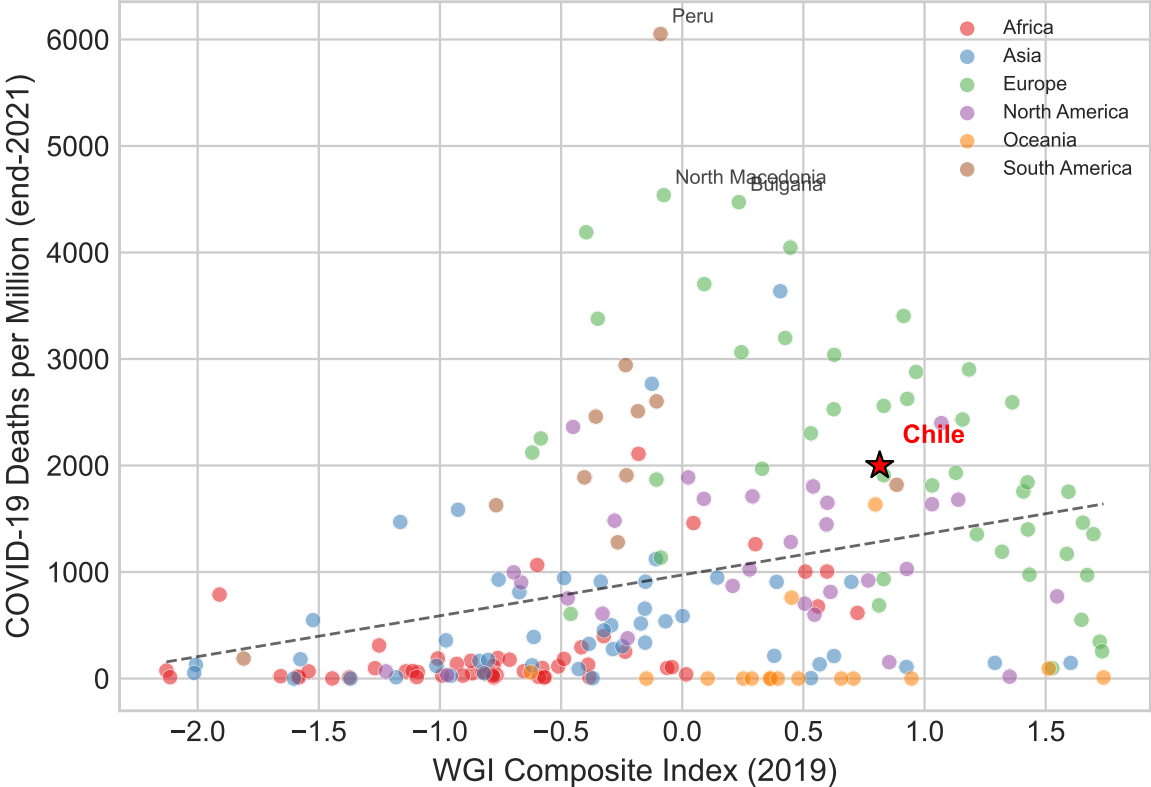

**Figure S1:** WGI Composite Index vs. COVID-19 Deaths per Million. Each point represents a country, colored by continent. Chile is highlighted with a red star. The dashed line is the OLS fit.

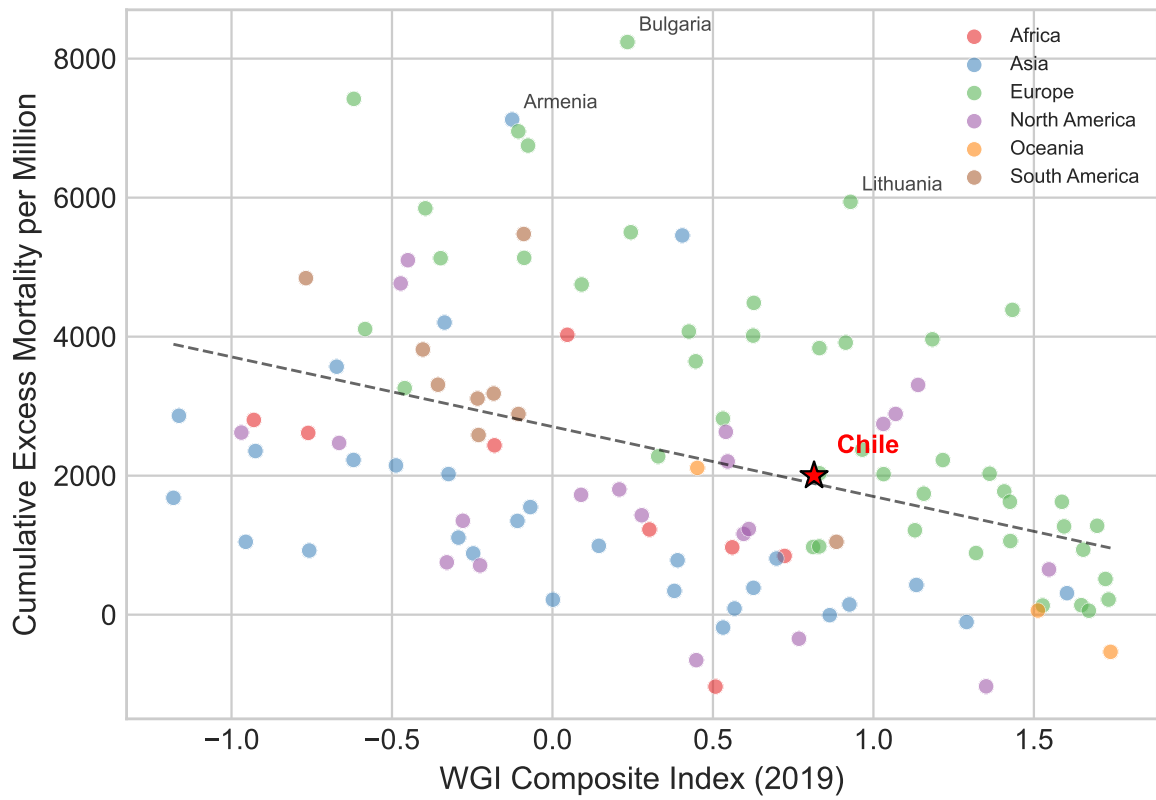

**Figure S2:** WGI Composite Index vs. Excess Mortality per Million

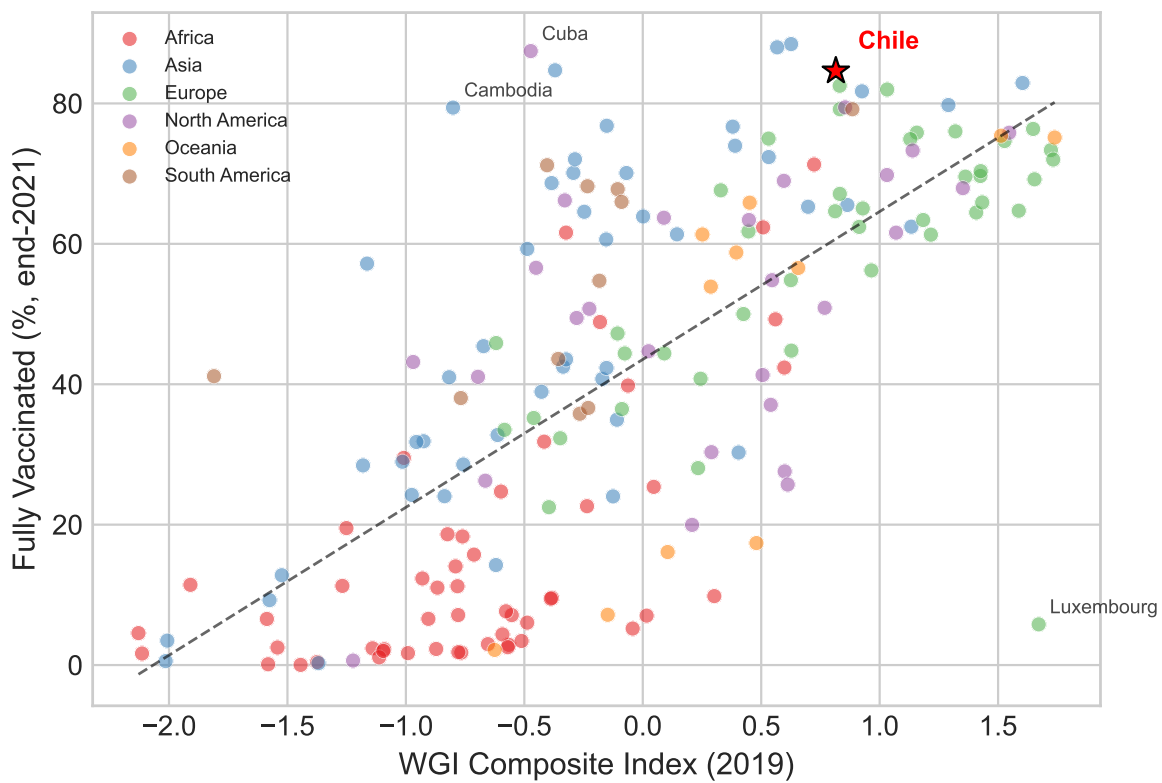

**Figure S3:** WGI Composite Index vs. Vaccination Rate (% Fully Vaccinated)

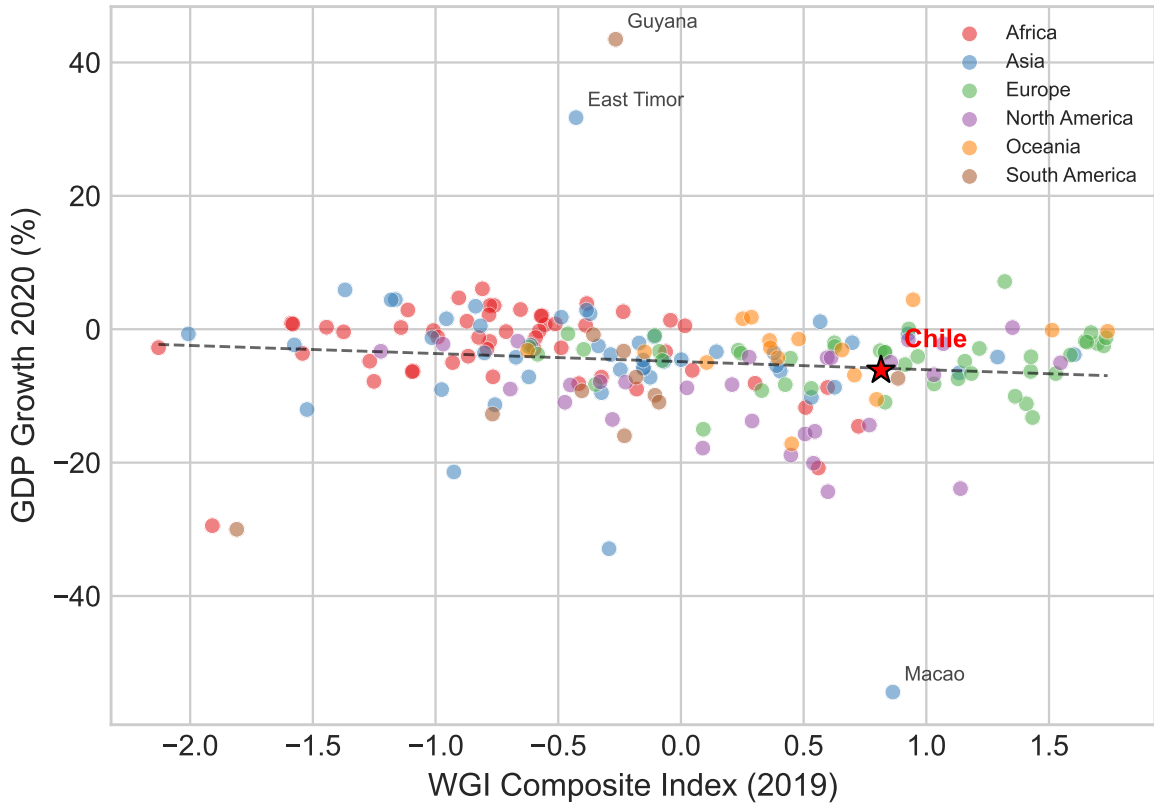

**Figure S4:** WGI Composite Index vs. GDP Growth 2020

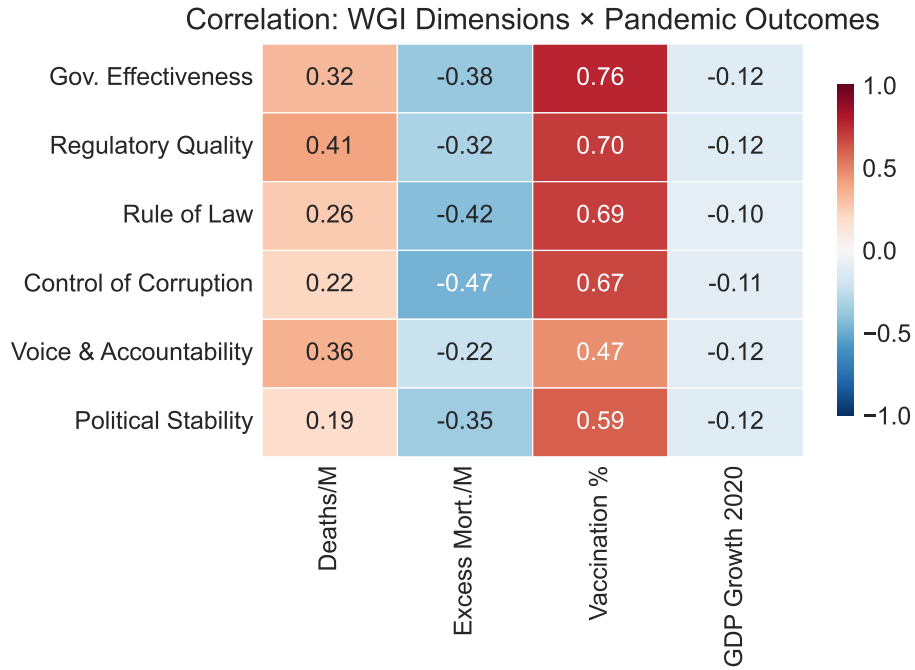

**Figure S5:** Correlation Heatmap: Individual WGI Dimensions and Pandemic Outcomes

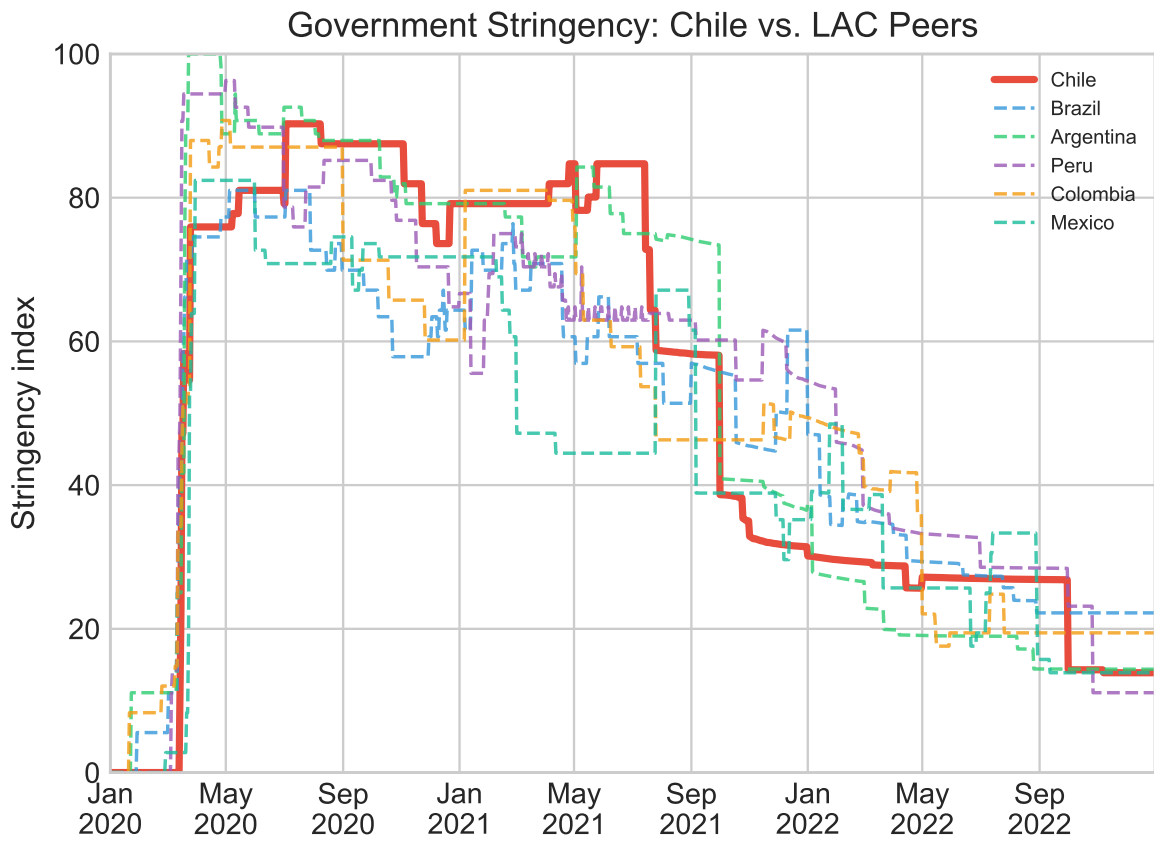

**Figure S6:** Government Stringency Index: Chile vs. Latin American Peers

## Supplementary Tables

Supplementary Table S1 reports attrition diagnostics for the full-specification samples. Supplementary Table S2 re-estimates the reported-deaths specification ladder on the common full-model sample, and Supplementary Table S3 does the same for the excess-mortality ladder.

**Table S1:** Attrition Diagnostics for Full-Specification Samples

|                    | Deaths incl. | Deaths excl. | Excess incl. | Excess excl. |
|--------------------|--------------|--------------|--------------|--------------|
| Countries          | 107          | 129          | 76           | 160          |
| WGI composite      | 0.136        | -0.209       | 0.441        | -0.306       |
| Log GDP per capita | 9.905        | 9.312        | 10.335       | 9.194        |
| Population 65+ (%) | 10.716       | 8.112        | 13.160       | 7.357        |
| Hospital beds/1000 | 3.060        | 2.982        | 3.745        | 2.405        |
| Physicians/1000    | 2.385        | 1.706        | 3.046        | 1.211        |

*Notes:* Included countries have non-missing data for the full specification of the relevant model. Excluded countries are all remaining countries in the analysis cross-section. Means are reported for the listed observables.

**Table S2:** Common-Sample Robustness: COVID-19 Deaths per Million

|                                               | (1)                      | (2)                      | (3)                      | (4)                      | (5)                      | (6)                     |
|-----------------------------------------------|--------------------------|--------------------------|--------------------------|--------------------------|--------------------------|-------------------------|
| <i>Dep. var.: COVID-19 deaths per million</i> |                          |                          |                          |                          |                          |                         |
| WGI composite                                 | 337.162***<br>(106.313)  | -573.943***<br>(178.000) | -553.660***<br>(179.542) | -461.354***<br>(177.090) | -490.843***<br>(176.020) | -375.274**<br>(190.670) |
| Constant                                      | 1147.146***<br>(114.061) | -1254.061<br>(1023.972)  | -697.347<br>(1283.798)   | -1246.828<br>(1211.218)  | -1522.596<br>(1276.914)  | -623.735<br>(1522.727)  |
| Log GDP per capita                            |                          | 37.672<br>(141.283)      | -15.868<br>(160.819)     | -69.260<br>(164.034)     | -22.007<br>(172.650)     | -9.007<br>(181.639)     |
| Population 65+ (%)                            |                          | 139.919***<br>(21.584)   | 128.934***<br>(31.322)   | 132.641***<br>(31.967)   | 130.154***<br>(32.311)   | 101.072***<br>(38.410)  |
| Pop. density                                  |                          | -0.134**<br>(0.063)      | -0.118*<br>(0.071)       | -0.109<br>(0.070)        | -0.106<br>(0.067)        | -0.034<br>(0.056)       |
| Urbanization (%)                              |                          | 10.755<br>(7.183)        | 9.470<br>(8.443)         | 6.601<br>(7.776)         | 6.129<br>(7.676)         | 0.196<br>(6.037)        |
| Health exp. (% GDP)                           |                          |                          | -9.040<br>(40.784)       | -3.825<br>(37.687)       | -5.885<br>(38.705)       | -57.711<br>(48.488)     |
| Hospital beds/1000                            |                          |                          | -29.121<br>(64.150)      | -1.763<br>(66.386)       | -9.748<br>(68.463)       | 41.489<br>(67.872)      |
| Physicians/1000                               |                          |                          | 131.908<br>(131.993)     | 112.063<br>(127.893)     | 115.762<br>(127.047)     | 121.719<br>(155.061)    |
| Stringency index                              |                          |                          |                          | 21.753**<br>(10.910)     | 21.609**<br>(10.881)     | 12.432<br>(8.767)       |
| Diabetes prev. (%)                            |                          |                          |                          |                          | -11.445<br>(16.674)      | 12.779<br>(15.524)      |
| N                                             | 107                      | 107                      | 107                      | 107                      | 107                      | 107                     |
| $R^2$                                         | 0.059                    | 0.401                    | 0.409                    | 0.434                    | 0.436                    | 0.584                   |
| Adj. $R^2$                                    | 0.050                    | 0.371                    | 0.361                    | 0.382                    | 0.377                    | 0.515                   |
| Continent FE                                  | No                       | No                       | No                       | No                       | No                       | Yes                     |

*Notes:* All columns are estimated on the common sample defined by non-missingness in the full specification for the stated outcome. This isolates coefficient changes from changes in country composition across the ladder. Robust (HC1) standard errors in parentheses. \*\*\* $p < 0.01$ ,

\*\* $p < 0.05$ , \* $p < 0.10$ .

**Table S3:** Common-Sample Robustness: Excess Mortality per Million

|                                                | (1)                       | (2)                       | (3)                       | (4)                       | (5)                       | (6)                       |
|------------------------------------------------|---------------------------|---------------------------|---------------------------|---------------------------|---------------------------|---------------------------|
| <i>Dep. var.: Excess mortality per million</i> |                           |                           |                           |                           |                           |                           |
| WGI composite                                  | -1036.065***<br>(213.824) | -2335.917***<br>(352.332) | -2230.523***<br>(358.464) | -2088.529***<br>(389.034) | -2094.014***<br>(397.213) | -1727.835***<br>(386.382) |
| Constant                                       | 2788.484***<br>(251.322)  | -1914.706<br>(3688.766)   | -550.049<br>(3973.498)    | -1841.892<br>(3753.746)   | -1881.879<br>(3789.839)   | 522.728<br>(4261.851)     |
| Log GDP per capita                             |                           | 214.301<br>(399.353)      | 81.793<br>(433.779)       | 53.714<br>(421.938)       | 62.979<br>(441.121)       | -150.806<br>(492.138)     |
| Population 65+ (%)                             |                           | 231.561***<br>(38.256)    | 229.752***<br>(55.559)    | 242.061***<br>(57.921)    | 241.326***<br>(60.064)    | 162.131**<br>(68.231)     |
| Pop. density                                   |                           | 0.017<br>(0.116)          | -0.000<br>(0.127)         | 0.009<br>(0.118)          | 0.009<br>(0.118)          | 0.123<br>(0.103)          |
| Urbanization (%)                               |                           | 0.144<br>(11.288)         | 2.079<br>(14.029)         | -1.571<br>(12.927)        | -1.579<br>(13.028)        | -5.322<br>(12.890)        |
| Health exp. (% GDP)                            |                           |                           | -86.091<br>(117.981)      | -103.318<br>(117.162)     | -103.716<br>(118.591)     | -190.917<br>(138.781)     |
| Hospital beds/1000                             |                           |                           | -41.525<br>(94.312)       | -2.279<br>(99.935)        | -3.713<br>(101.904)       | 86.664<br>(96.966)        |
| Physicians/1000                                |                           |                           | 207.299<br>(218.963)      | 191.236<br>(211.475)      | 190.681<br>(214.568)      | 269.922<br>(257.393)      |
| Stringency index                               |                           |                           |                           | 31.242*<br>(18.134)       | 31.030*<br>(18.540)       | 30.689<br>(19.931)        |
| Diabetes prev. (%)                             |                           |                           |                           |                           | -2.691<br>(33.795)        | 38.638<br>(29.636)        |
| N                                              | 76                        | 76                        | 76                        | 76                        | 76                        | 76                        |
| $R^2$                                          | 0.187                     | 0.535                     | 0.549                     | 0.565                     | 0.565                     | 0.642                     |
| Adj. $R^2$                                     | 0.176                     | 0.502                     | 0.495                     | 0.505                     | 0.498                     | 0.553                     |
| Continent FE                                   | No                        | No                        | No                        | No                        | No                        | Yes                       |

*Notes:* All columns are estimated on the common sample defined by non-missingness in the full specification for the stated outcome. This isolates coefficient changes from changes in country composition across the ladder. Robust (HC1) standard errors in parentheses. \*\*\* $p < 0.01$ , \*\* $p < 0.05$ , \* $p < 0.10$ .
